# Supplementary material
Source: Springer Nature journal article supplement (https://www.springermedizin.de/resource/supplementary/12990_2014_638_MOESM2_ESM.pdf/9612274)

## Ultrasonic vocalizations to innocuous stimuli

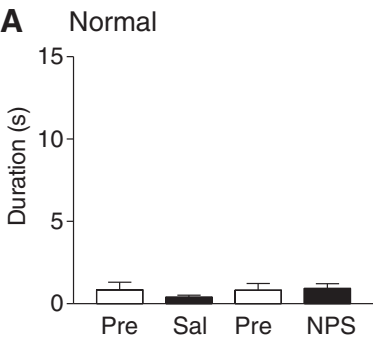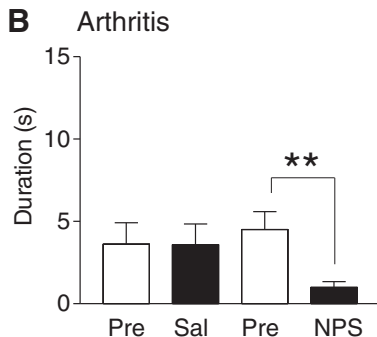

## Ultrasonic vocalizations to noxious stimuli

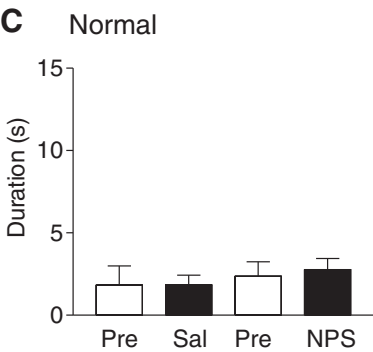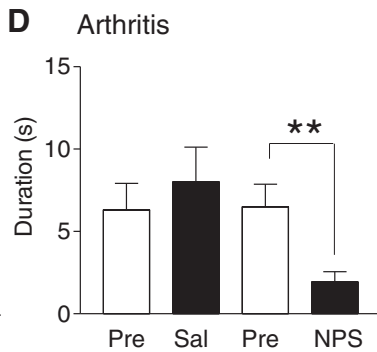

Supplement: MOESM2 [file 9612274]
